# Supplementary material for: Implications of multiple freeze-thawing on respiratory samples for culture-independent analyses
Source: PubMed Central journal article supplement — J Cyst Fibros. Author manuscript; Available in PMC 2016 Jul 1. (PMC4793934; doi:10.1016/j.jcf.2014.10.004), 2014-10-24
Supplement: NIHMS762502-supplement-Supplement.pdf [file NIHMS762502-supplement-Supplement.pdf]

**Fig S1.** Rank abundance curves for each patient's bacterial community after a single freeze thaw cycle. Abundances are expressed as percentage of total abundance within each community. The arrows indicate the inflection point of each curve. Species to the left of the arrow were classified as common, and those at the right side were classified as rare.

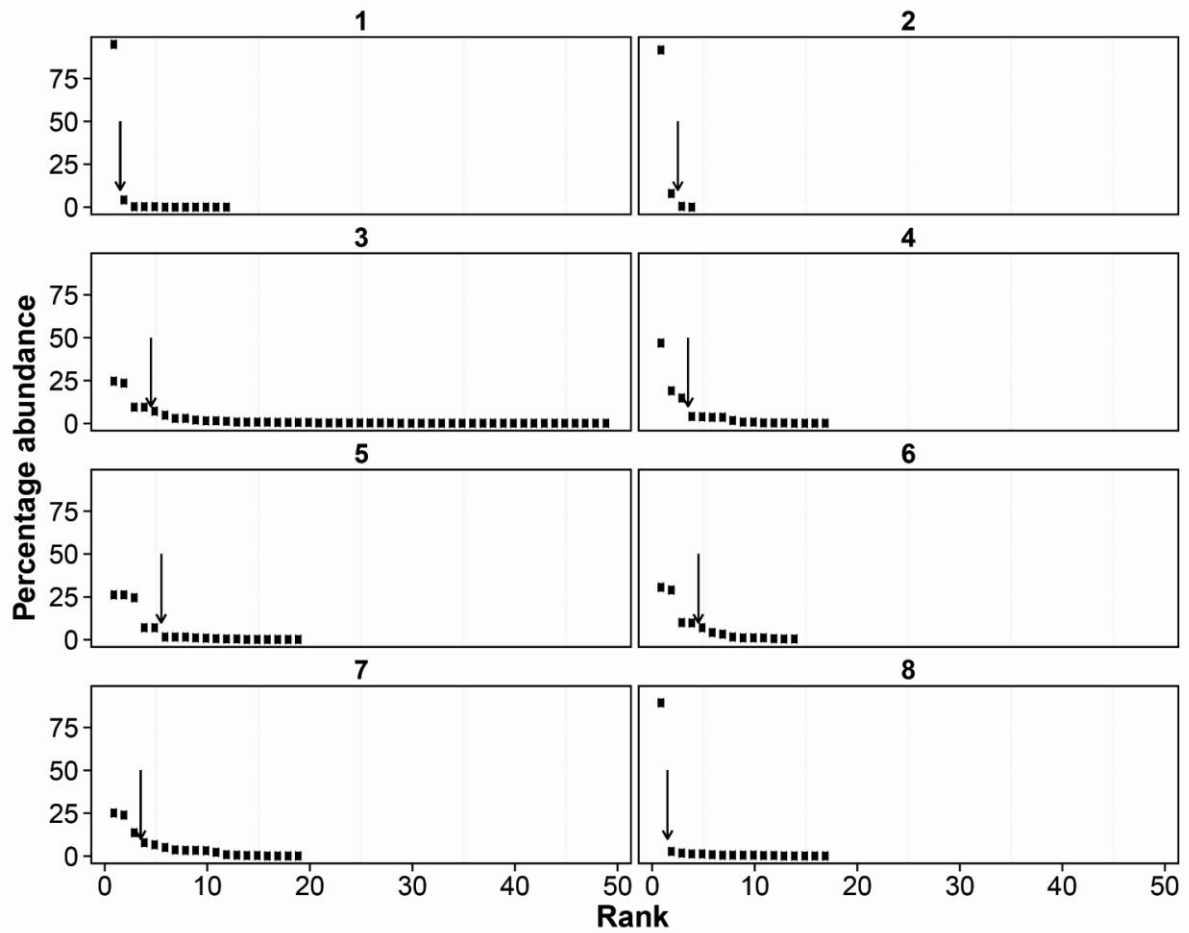

**Table S1.** The raw sequence data reported in this paper have been deposited in the NCBI Short Read Archive database (Accession number PRJNA243349 ). A list of barcodes used and their associated sample are listed below.

| Barcode      | Patient | Sub-sample | Barcode       | Patient | Sub-sample |
|--------------|---------|------------|---------------|---------|------------|
| ATGGCGTGCACA | 1       | 1          | ATGTGCACGACT  | 5       | 1          |
| CAACACGCACGA | 1       | 2          | GTCGCTGTCTTC  | 5       | 2          |
| GTCTATCGGAGT | 1       | 3          | GTCTGGATAGCG  | 5       | 3          |
| GTGAGGTCGCTA | 1       | 4          | GTGGCGATACAC  | 5       | 4          |
| GTGTGTGTCAGG | 1       | 5          | GTTGACGACAGC  | 5       | 5          |
| TAAGCGCAGCAC | 1       | 6          | TACAGTCTCATG  | 5       | 6          |
| ATGGTCTACTAC | 2       | 1          | ATGTGTGCGACTT | 6       | 1          |
| CAACTATCAGCT | 2       | 2          | GTCGTAGCCAGA  | 6       | 2          |
| GTCTCATGTAGG | 2       | 3          | GTCTTCGTCGCT  | 6       | 3          |
| GTGATAGTGCCG | 2       | 4          | GTGTACCTATCA  | 6       | 4          |
| GTGTTGCAGCAT | 2       | 5          | GTTGTATACTCG  | 6       | 5          |
| TACACACATGGC | 2       | 6          | ATTATCGTGAC   | 7       | 1          |
| ATGTACGGCGAC | 3       | 1          | GTCGTGTGTCAA  | 7       | 2          |
| CAACTCATCGTA | 3       | 2          | GTGACCTGATGT  | 7       | 3          |
| GTCTCTCTACGC | 3       | 3          | GTGTCTACATTG  | 7       | 4          |
| GTGCAATCGACG | 3       | 4          | TAACAGTCGCTG  | 7       | 5          |
| GTTAGAGCACTC | 3       | 5          | ATTCTGTGAGCG  | 8       | 1          |
| TACACGATCTAC | 3       | 6          | GTCTACACACAT  | 8       | 2          |
| ATGTCACCGTGA | 4       | 1          | GTGACTGCGGAT  | 8       | 3          |
| CAAGATCGACTC | 4       | 2          | GTGTGCTATCAG  | 8       | 4          |
| GTCTGACAGTTG | 4       | 3          | TAACTCTGATGC  | 8       | 5          |
| GTGCACATTATC | 4       | 4          | TACGATGACCAC  | 8       | 6          |
| GTTCGCGTATAG | 4       | 5          |               |         |            |
| TACAGATGGCTC | 4       | 6          |               |         |            |

**Table S2.** Bacterial taxa samples across eight sputum samples from adult CF patients. Species-level identities of detected taxa are reported here. However, given the sequence read length of the ribosomal sequences analysed, these identities should be considered putative.

| <b>Class</b>         | <b>Family</b>                        | <b>Taxon name</b>                  |
|----------------------|--------------------------------------|------------------------------------|
| Actinomycetales      | Actinomycetaceae                     | <i>Actinomyces odontolyticus</i>   |
|                      |                                      | <i>Actinomyces oris</i>            |
|                      | Corynebacteriaceae                   | <i>Corynebacterium durum</i>       |
|                      |                                      | <i>Corynebacterium matruchotii</i> |
|                      | Micrococcaceae                       | <i>Rothia mucilaginosa</i>         |
| Propionibacteriaceae | <i>Propionibacterium propionicum</i> |                                    |
| Bacillales           | Bacillales                           | <i>Gemella morbillorum</i>         |
|                      | Staphylococcaceae                    | <i>Staphylococcus aureus</i>       |
| Bacteroidales        | Bacteroidaceae                       | <i>Bacteroides acidofaciens</i>    |
|                      |                                      | <i>Bacteroides vulgatus</i>        |
|                      | Porphyromonadaceae                   | <i>Porphyromonas catoniae</i>      |
|                      |                                      | <i>Porphyromonas endodontalis</i>  |
|                      |                                      | <i>Tannerella forsythia</i>        |
|                      |                                      | <i>Alloprevotella rava</i>         |
|                      |                                      | <i>Prevotella denticola</i>        |
|                      | Prevotellaceae                       | <i>Prevotella histicola</i>        |
|                      |                                      | <i>Prevotella loescheii</i>        |
|                      |                                      | <i>Prevotella maculosa</i>         |
|                      |                                      | <i>Prevotella melaninogenica</i>   |
|                      |                                      | <i>Prevotella nanceiensis</i>      |
|                      |                                      | <i>Prevotella nigrescens</i>       |
|                      |                                      | <i>Prevotella oralis</i>           |
|                      |                                      | <i>Prevotella oris</i>             |
| Rikenellaceae        | <i>Prevotella pallens</i>            |                                    |
|                      | <i>Prevotella pleuritidis</i>        |                                    |
| Burkholderiales      | Alcaligenaceae                       | <i>Prevotella salivae</i>          |
|                      |                                      | <i>Prevotella tannerae</i>         |
|                      |                                      | <i>Alistipes finegoldii</i>        |
|                      |                                      | <i>Achromobacter xylosoxidans</i>  |

|                   |                       |                                    |
|-------------------|-----------------------|------------------------------------|
|                   | Burkholderiaceae      | <i>Lautropia mirabilis</i>         |
|                   | Sutterellaceae        | <i>Sutterella wadsworthensis</i>   |
| Campylobacterales | Campylobacteraceae    | <i>Campylobacter concisus</i>      |
| Clostridiales     | Clostridiaceae        | <i>Clostridium</i> sp.             |
|                   | Clostridiales         | <i>Parvimonas micra</i>            |
|                   | Eubacteriaceae        | <i>Eubacterium brachy</i>          |
|                   |                       | <i>Eubacterium sulci</i>           |
|                   | Lachnospiraceae       | <i>Butyrivibrio fibrisolvens</i>   |
|                   |                       | <i>Catonella morbi</i>             |
|                   |                       | <i>Lachnoanaerobaculum orale</i>   |
|                   |                       | <i>Oribacterium sinus</i>          |
|                   |                       | <i>Shuttleworthia satelles</i>     |
|                   |                       | <i>Stomatobaculum longum</i>       |
|                   | Peptostreptococcaceae | <i>Peptostreptococcus stomatis</i> |
| Coriobacteriales  | Coriobacteriaceae     | <i>Atopobium parvulum</i>          |
|                   |                       | <i>Olsenella uli</i>               |
| Enterobacteriales | Enterobacteriaceae    | <i>Escherichia coli</i>            |
| Flavobacteriales  | Flavobacteriaceae     | <i>Capnocytophaga granulosa</i>    |
|                   |                       | <i>Capnocytophaga haemolytica</i>  |
|                   |                       | <i>Capnocytophaga ochracea</i>     |
|                   |                       | <i>Fusobacterium nucleatum</i>     |
|                   | Leptotrichiaceae      | <i>Leptotrichia buccalis</i>       |
|                   |                       | <i>Leptotrichia wadei</i>          |
|                   |                       | <i>Sneathia sanguinegens</i>       |
| Lactobacillales   | Aerococcaceae         | <i>Abiotrophia defectiva</i>       |
|                   | Carnobacteriaceae     | <i>Granulicatella adiacens</i>     |
|                   | Lactobacillaceae      | <i>Lactobacillus fermentum</i>     |
|                   |                       | <i>Lactobacillus johnsonii</i>     |
|                   | Streptococcaceae      | <i>Streptococcus mutans</i>        |
|                   |                       | <i>Streptococcus parasanguinis</i> |
|                   |                       | <i>Streptococcus salivarius</i>    |
| Mycoplasmatales   | Mycoplasmataceae      | <i>Mycoplasma salivarium</i>       |
| Neisseriales      | Neisseriaceae         | <i>Kingella denitrificans</i>      |
| Pasteurellales    | Pasteurellaceae       | <i>Haemophilus parainfluenzae</i>  |
| Pseudomonadales   | Moraxellaceae         | <i>Acinetobacter johnsonii</i>     |
|                   |                       | <i>Moraxella osloensis</i>         |
|                   | Pseudomonadaceae      | <i>Pseudomonas aeruginosa</i>      |

Rhizobiales

Hyphomicrobiaceae

*Pseudomonas putida*

*Hyphomicrobium* sp.

Selenomonadales

Veillonellaceae

*Selenomonas noxia*

*Anaeroglobus geminatus*

*Dialister invisus*

*Megasphaera micronuciformis*

*Selenomonas artemidis*

*Selenomonas noxia*

*Selenomonas sputigena*

*Veillonella parvula*
